# Supplementary material for: Use of Lichens to Evaluate the Impact of Post-Earthquake Reconstruction Activities on Air Quality: A Case Study from the City of L’Aquila
Source: MDPI journal article supplement (doi:10.3390/biology11081199), 2022-08-10
Supplement: s1 [file s1]

**Table S2.** Presence/absence of lichen species recorded at nine sites (Site, numbered from 1 to 9) in the city of L'Aquila (Central Italy). Site numbers as in Table 1.

| Site   | <i>Xanthoria<br/>parietina</i> | <i>Physconia<br/>distorta</i> | <i>Physcia<br/>adscendens</i> | <i>Evernia<br/>prunastri</i> | <i>Parmelina<br/>tiliacea</i> | <i>Melanelixia<br/>glabra</i> | <i>Pleurosticta<br/>acetabulum</i> |
|--------|--------------------------------|-------------------------------|-------------------------------|------------------------------|-------------------------------|-------------------------------|------------------------------------|
| Site 1 | 1                              | 1                             | 1                             | 0                            | 0                             | 0                             | 0                                  |
| Site 2 | 0                              | 0                             | 0                             | 0                            | 0                             | 0                             | 0                                  |
| Site 3 | 1                              | 1                             | 1                             | 0                            | 0                             | 0                             | 0                                  |
| Site 4 | 1                              | 1                             | 1                             | 0                            | 0                             | 0                             | 0                                  |
| Site 5 | 1                              | 1                             | 1                             | 0                            | 1                             | 1                             | 1                                  |
| Site 6 | 1                              | 1                             | 1                             | 0                            | 0                             | 0                             | 0                                  |
| Site 7 | 1                              | 1                             | 1                             | 1                            | 1                             | 1                             | 1                                  |
| Site 8 | 1                              | 1                             | 1                             | 0                            | 0                             | 0                             | 0                                  |
| Site 9 | 1                              | 1                             | 1                             | 1                            | 1                             | 1                             | 1                                  |
