# Supplementary material for: Use of Lichens to Evaluate the Impact of Post-Earthquake Reconstruction Activities on Air Quality: A Case Study from the City of L’Aquila
Source: MDPI journal article supplement (doi:10.3390/biology11081199), 2022-08-10
Supplement: s1 [file s1]

**Table S1.** Number of lichen species recorded in each of the five quadrats of the vertical grids used to sample epiphytic lichens at nine sites (Sites, numbered from 1 to 9) in the city of L'Aquila (Central Italy). At each site, three trees (numbered from 1 to 3) were sampled, and the grid was placed at the four cardinal points. Site numbers as in Table 1.

| Site | Tree | East | South | North | West |
|------|------|------|-------|-------|------|
| 1    | 1    | 2    | 1     | 2     | 2    |
| 1    | 1    | 2    | 1     | 2     | 2    |
| 1    | 1    | 2    | 1     | 2     | 2    |
| 1    | 1    | 2    | 1     | 2     | 2    |
| 1    | 1    | 3    | 2     | 2     | 2    |
| 1    | 2    | 2    | 1     | 2     | 1    |
| 1    | 2    | 1    | 1     | 1     | 2    |
| 1    | 2    | 2    | 1     | 2     | 2    |
| 1    | 2    | 2    | 1     | 2     | 1    |
| 1    | 2    | 1    | 1     | 1     | 3    |
| 1    | 3    | 1    | 0     | 2     | 1    |
| 1    | 3    | 1    | 0     | 1     | 1    |
| 1    | 3    | 1    | 0     | 1     | 0    |
| 1    | 3    | 0    | 1     | 1     | 0    |
| 1    | 3    | 0    | 1     | 1     | 1    |
| 3    | 1    | 1    | 2     | 3     | 1    |
| 3    | 1    | 2    | 2     | 2     | 2    |
| 3    | 1    | 1    | 2     | 2     | 2    |
| 3    | 1    | 2    | 2     | 2     | 2    |
| 3    | 1    | 2    | 1     | 3     | 2    |
| 3    | 2    | 2    | 2     | 2     | 2    |
| 3    | 2    | 1    | 2     | 2     | 2    |
| 3    | 2    | 1    | 2     | 2     | 2    |
| 3    | 2    | 0    | 2     | 2     | 2    |
| 3    | 2    | 1    | 1     | 1     | 2    |
| 3    | 3    | 1    | 1     | 2     | 2    |
| 3    | 3    | 2    | 1     | 2     | 2    |
| 3    | 3    | 2    | 0     | 1     | 2    |
| 3    | 3    | 2    | 0     | 2     | 2    |
| 3    | 3    | 3    | 1     | 2     | 2    |
| 4    | 1    | 2    | 2     | 2     | 2    |
| 4    | 1    | 2    | 2     | 2     | 2    |
| 4    | 1    | 2    | 2     | 1     | 1    |
| 4    | 1    | 2    | 1     | 1     | 1    |
| 4    | 1    | 0    | 0     | 1     | 0    |
| 4    | 2    | 2    | 2     | 2     | 2    |
| 4    | 2    | 2    | 2     | 2     | 2    |
| 4    | 2    | 2    | 0     | 2     | 1    |

|   |   |   |   |   |   |
|---|---|---|---|---|---|
| 4 | 2 | 2 | 1 | 2 | 1 |
| 4 | 2 | 2 | 1 | 2 | 1 |
| 4 | 3 | 1 | 2 | 2 | 2 |
| 4 | 3 | 2 | 2 | 1 | 2 |
| 4 | 3 | 0 | 2 | 2 | 1 |
| 4 | 3 | 2 | 2 | 1 | 2 |
| 4 | 3 | 2 | 1 | 1 | 1 |
| 5 | 1 | 1 | 2 | 2 | 2 |
| 5 | 1 | 1 | 1 | 1 | 2 |
| 5 | 1 | 2 | 1 | 2 | 1 |
| 5 | 1 | 1 | 2 | 1 | 2 |
| 5 | 1 | 1 | 1 | 2 | 1 |
| 5 | 2 | 2 | 1 | 3 | 2 |
| 5 | 2 | 2 | 0 | 2 | 2 |
| 5 | 2 | 1 | 0 | 3 | 2 |
| 5 | 2 | 2 | 1 | 2 | 2 |
| 5 | 2 | 2 | 0 | 3 | 2 |
| 5 | 3 | 2 | 2 | 2 | 3 |
| 5 | 3 | 2 | 2 | 2 | 2 |
| 5 | 3 | 2 | 2 | 1 | 2 |
| 5 | 3 | 2 | 1 | 2 | 2 |
| 5 | 3 | 2 | 2 | 1 | 2 |
| 6 | 1 | 1 | 1 | 2 | 2 |
| 6 | 1 | 2 | 2 | 3 | 2 |
| 6 | 1 | 2 | 1 | 3 | 2 |
| 6 | 1 | 2 | 1 | 2 | 2 |
| 6 | 1 | 2 | 1 | 2 | 3 |
| 6 | 2 | 1 | 1 | 2 | 2 |
| 6 | 2 | 2 | 1 | 2 | 2 |
| 6 | 2 | 2 | 0 | 2 | 2 |
| 6 | 2 | 1 | 0 | 3 | 2 |
| 6 | 2 | 2 | 1 | 2 | 2 |
| 6 | 3 | 2 | 2 | 3 | 2 |
| 6 | 3 | 3 | 2 | 2 | 2 |
| 6 | 3 | 1 | 1 | 2 | 2 |
| 6 | 3 | 2 | 2 | 2 | 1 |
| 6 | 3 | 2 | 2 | 2 | 2 |
| 7 | 1 | 4 | 2 | 3 | 3 |
| 7 | 1 | 3 | 3 | 3 | 2 |
| 7 | 1 | 4 | 2 | 3 | 2 |
| 7 | 1 | 3 | 2 | 3 | 1 |
| 7 | 1 | 4 | 2 | 4 | 3 |
| 7 | 2 | 4 | 3 | 2 | 2 |
| 7 | 2 | 3 | 3 | 2 | 3 |
| 7 | 2 | 4 | 3 | 2 | 2 |
| 7 | 2 | 2 | 2 | 3 | 2 |
| 7 | 2 | 3 | 4 | 2 | 2 |

|   |   |   |   |   |   |
|---|---|---|---|---|---|
| 7 | 3 | 2 | 2 | 3 | 3 |
| 7 | 3 | 2 | 3 | 3 | 2 |
| 7 | 3 | 3 | 3 | 3 | 2 |
| 7 | 3 | 4 | 4 | 3 | 3 |
| 7 | 3 | 3 | 3 | 2 | 2 |
| 8 | 1 | 1 | 1 | 0 | 1 |
| 8 | 1 | 1 | 1 | 2 | 1 |
| 8 | 1 | 0 | 0 | 1 | 1 |
| 8 | 1 | 1 | 0 | 1 | 0 |
| 8 | 1 | 0 | 0 | 1 | 0 |
| 8 | 2 | 1 | 1 | 2 | 1 |
| 8 | 2 | 1 | 0 | 1 | 2 |
| 8 | 2 | 2 | 1 | 1 | 1 |
| 8 | 2 | 1 | 1 | 1 | 1 |
| 8 | 2 | 1 | 0 | 0 | 1 |
| 8 | 3 | 1 | 1 | 1 | 2 |
| 8 | 3 | 2 | 1 | 1 | 1 |
| 8 | 3 | 1 | 1 | 0 | 1 |
| 8 | 3 | 1 | 2 | 1 | 1 |
| 8 | 3 | 0 | 1 | 1 | 1 |
| 9 | 1 | 2 | 3 | 3 | 3 |
| 9 | 1 | 2 | 3 | 2 | 2 |
| 9 | 1 | 4 | 2 | 2 | 2 |
| 9 | 1 | 3 | 2 | 2 | 3 |
| 9 | 1 | 1 | 1 | 1 | 1 |
| 9 | 2 | 3 | 2 | 2 | 1 |
| 9 | 2 | 3 | 3 | 2 | 3 |
| 9 | 2 | 4 | 4 | 3 | 3 |
| 9 | 2 | 4 | 2 | 2 | 2 |
| 9 | 2 | 3 | 3 | 3 | 3 |
| 9 | 3 | 4 | 3 | 3 | 3 |
| 9 | 3 | 3 | 2 | 3 | 3 |
| 9 | 3 | 3 | 4 | 4 | 3 |
| 9 | 3 | 4 | 3 | 3 | 2 |
| 9 | 3 | 2 | 3 | 2 | 2 |

---
