# Supplementary material for: Use of Lichens to Evaluate the Impact of Post-Earthquake Reconstruction Activities on Air Quality: A Case Study from the City of L’Aquila
Source: MDPI journal article supplement (doi:10.3390/biology11081199), 2022-08-10
Supplement: s1 [file s1]

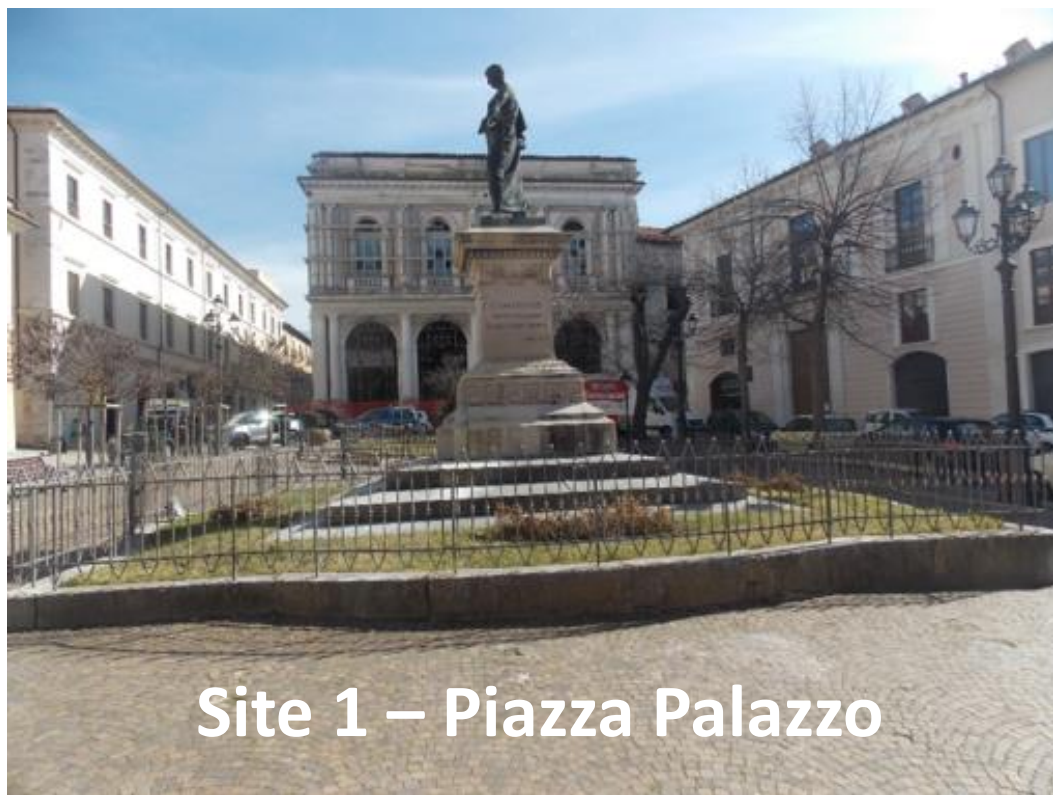

**Site 1 – Piazza Palazzo**

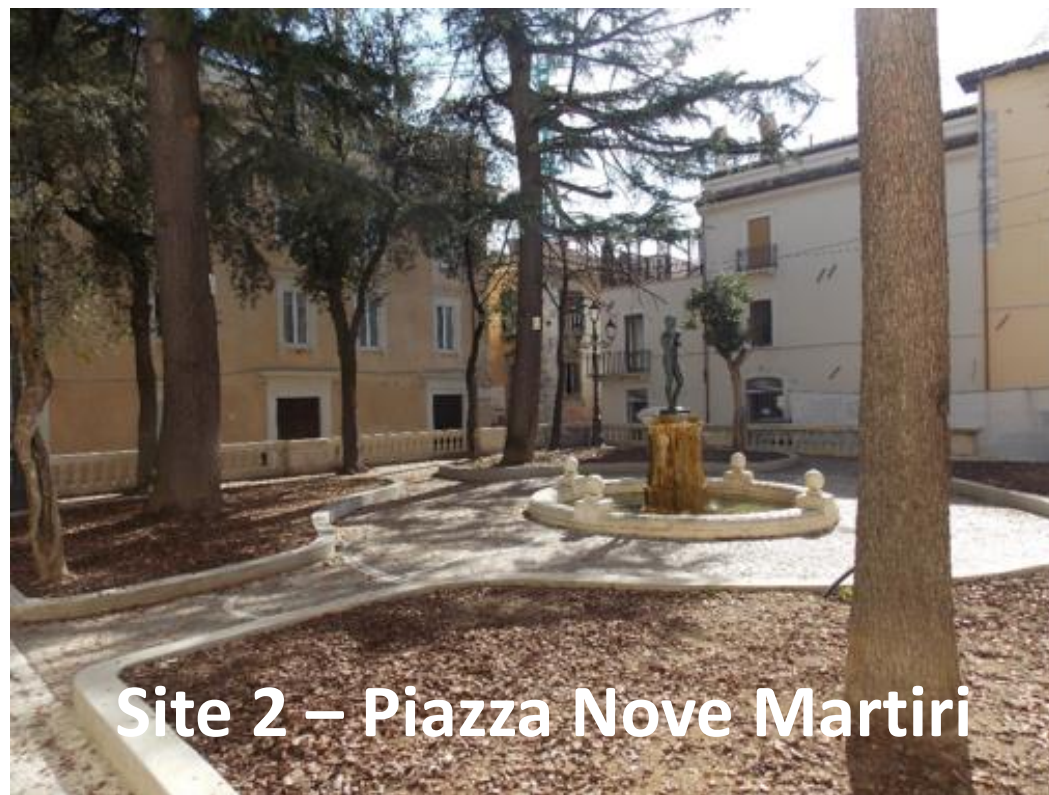

**Site 2 – Piazza Nove Martiri**

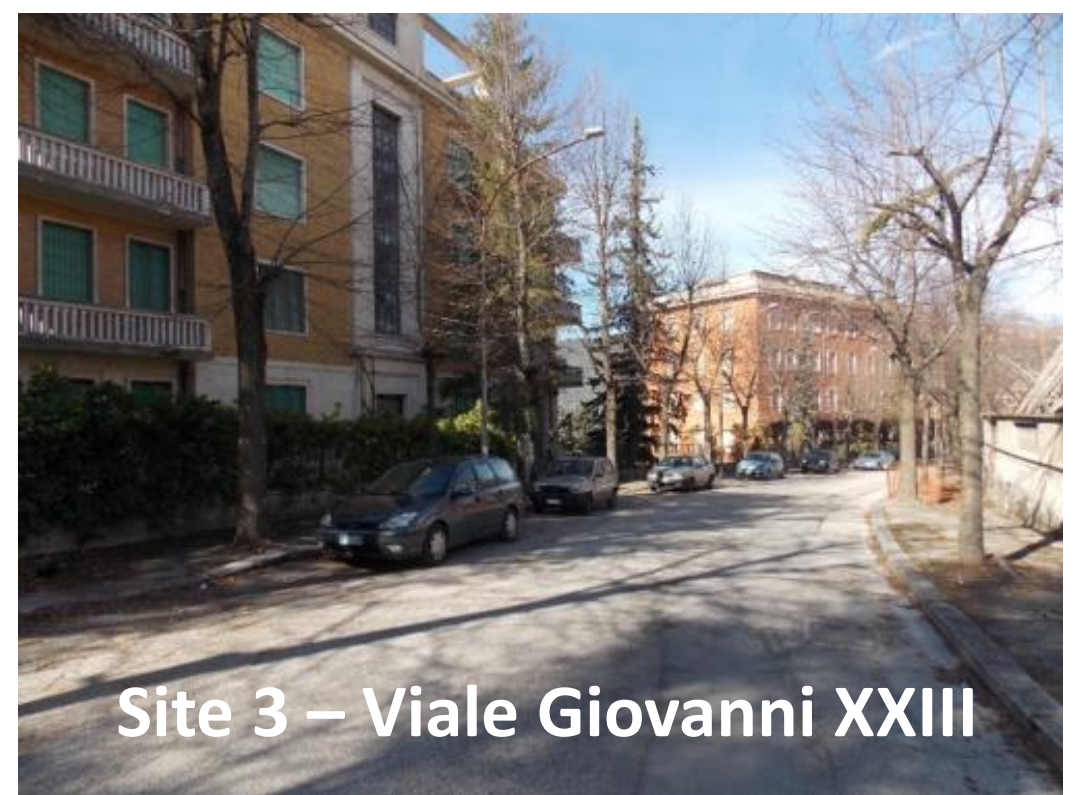

**Site 3 – Viale Giovanni XXIII**

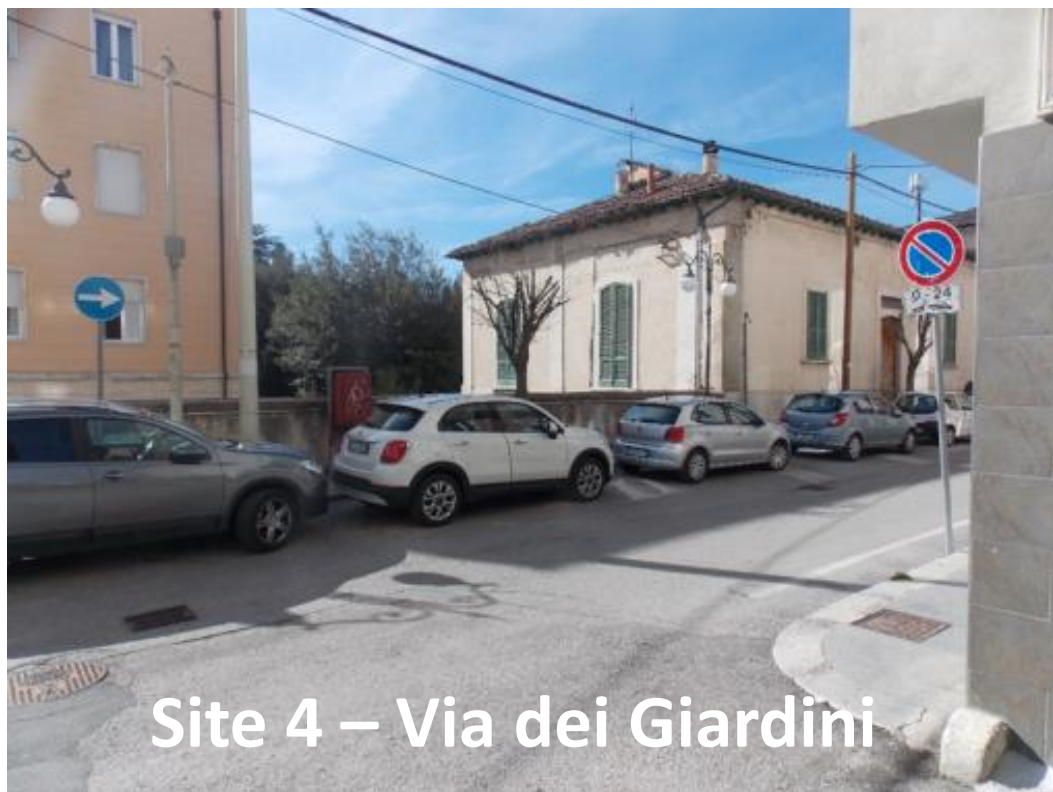

**Site 4 – Via dei Giardini**

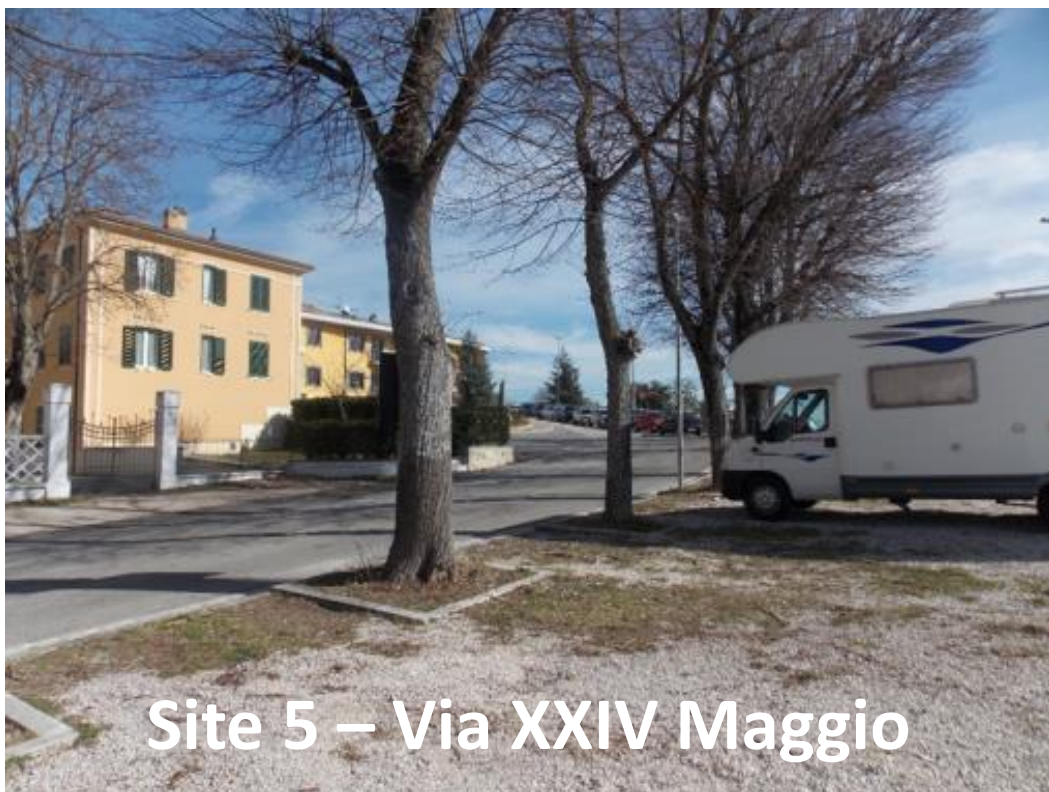

**Site 5 – Via XXIV Maggio**

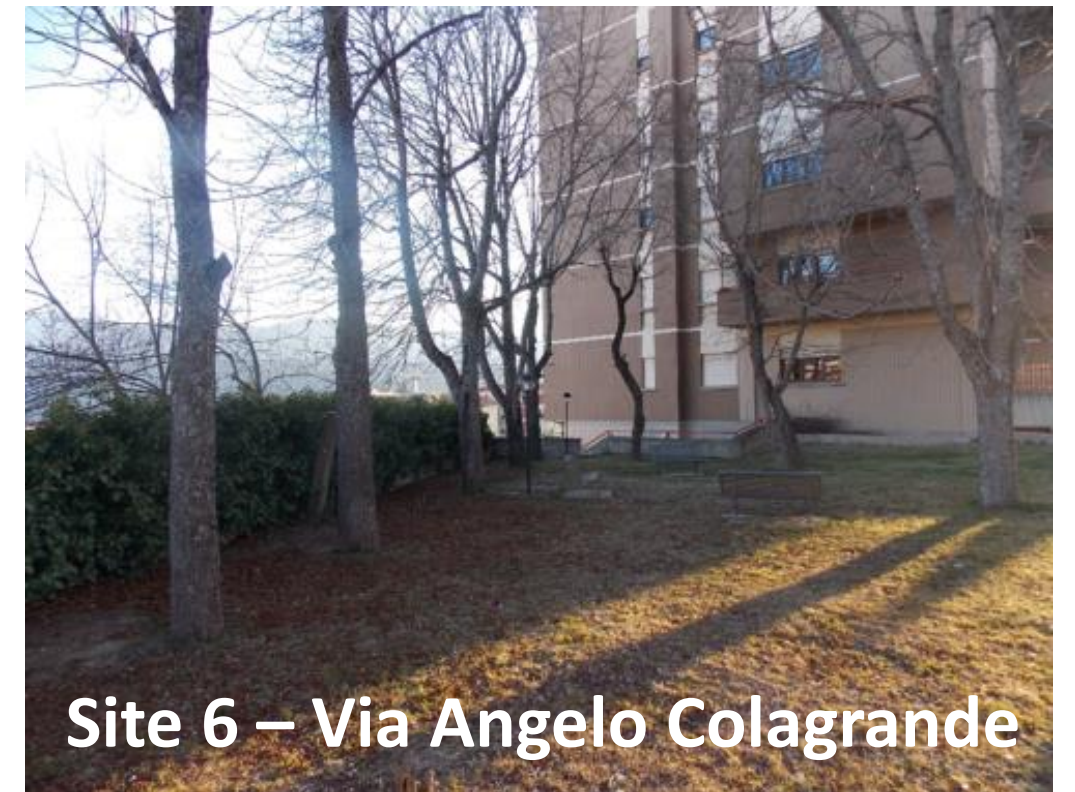

**Site 6 – Via Angelo Colagrande**

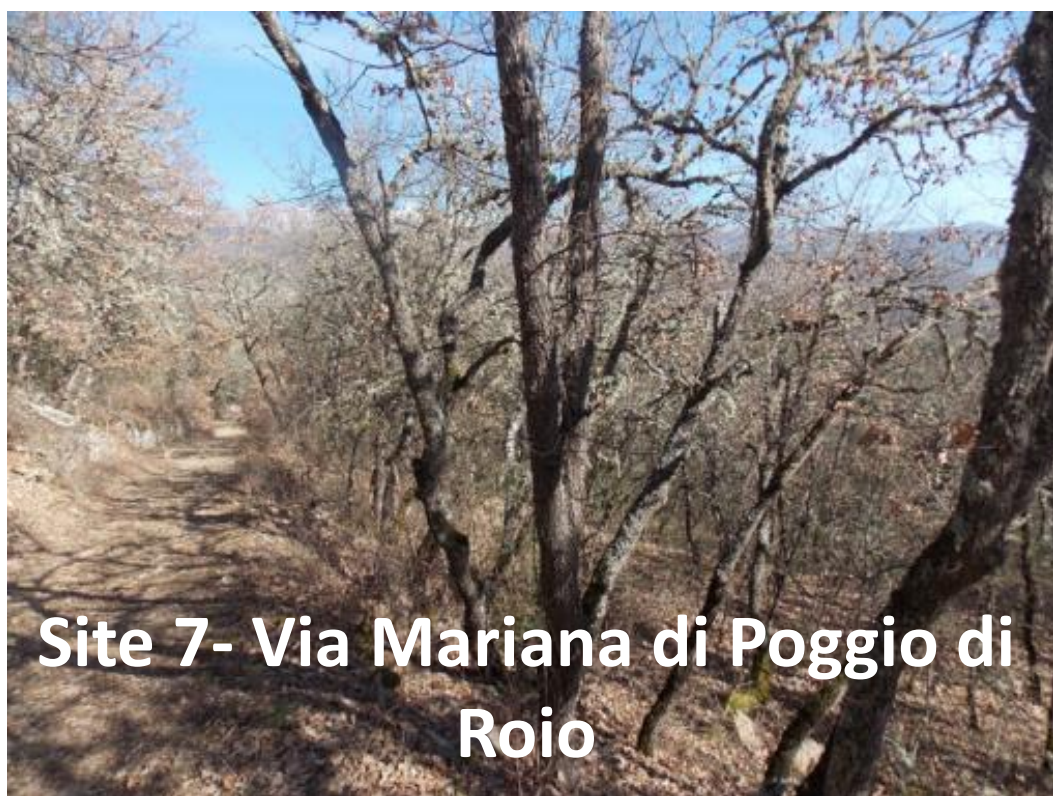

**Site 7- Via Mariana di Poggio di Roio**

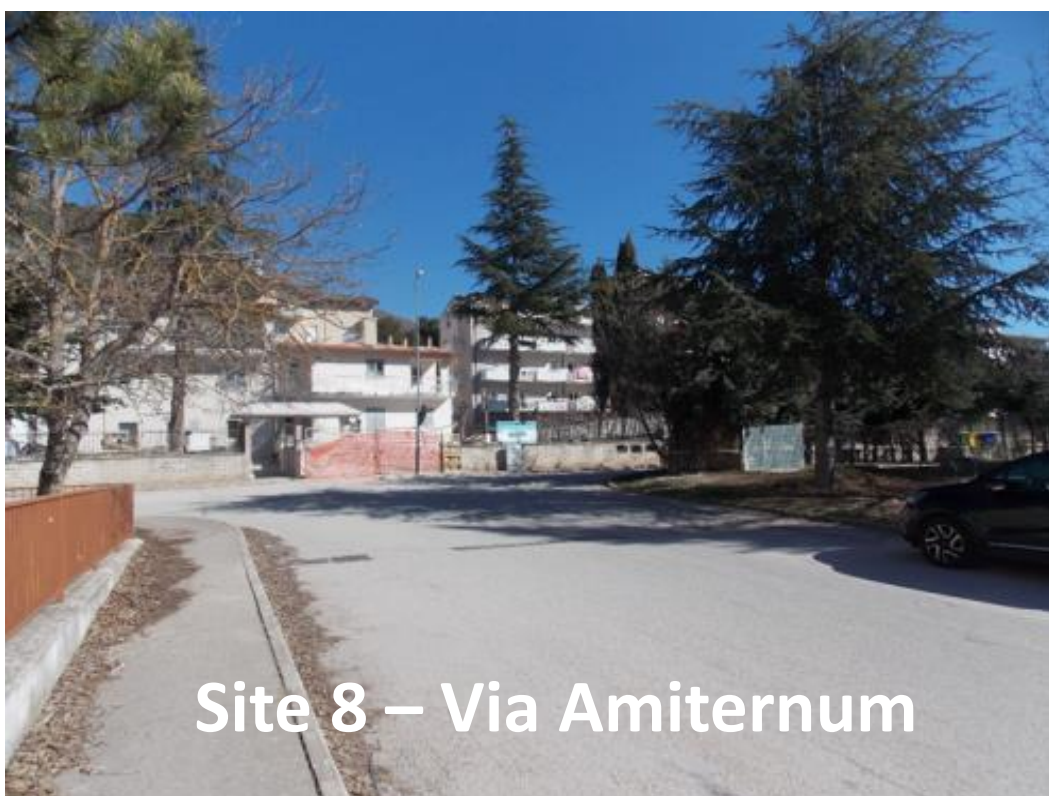

**Site 8 – Via Amiternum**

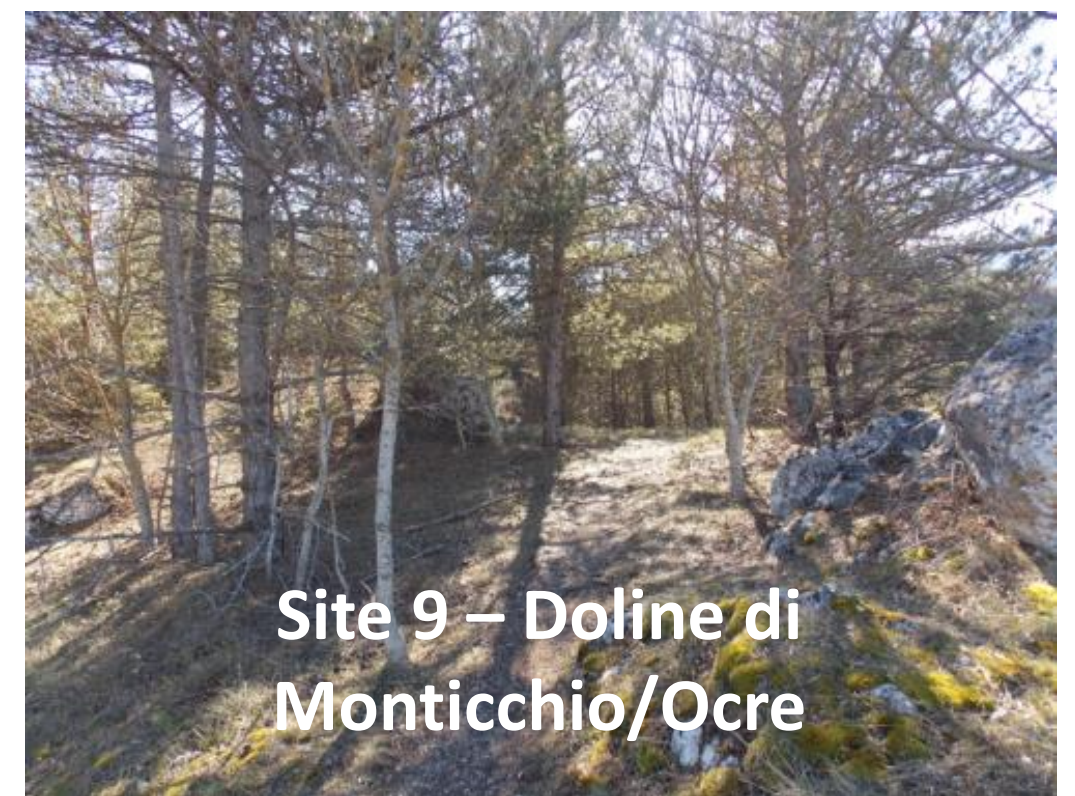

**Site 9 – Doline di Monticchio/Ocre**
