# Supplementary material for: Use of Lichens to Evaluate the Impact of Post-Earthquake Reconstruction Activities on Air Quality: A Case Study from the City of L’Aquila
Source: Biology (Basel). 2022 Aug 10;11(8):1199. doi: 10.3390/biology11081199 (PMC9405126; doi:10.3390/biology11081199)
Supplement: Supplementary file 1 [file biology-11-01199-s001.zip]

Archive with 6 entries (6 files):
- SupplementaryMaterials Corrected/Figure S1.pdf
- SupplementaryMaterials Corrected/Figure S2.pdf
- SupplementaryMaterials Corrected/Figure S3.pdf
- SupplementaryMaterials Corrected/Table S1.pdf
- SupplementaryMaterials Corrected/Table S2.pdf
- SupplementaryMaterials Corrected/Table S3.pdf
