# Supplementary figures and images for: Use of Lichens to Evaluate the Impact of Post-Earthquake Reconstruction Activities on Air Quality: A Case Study from the City of L’Aquila
Source: MDPI journal article supplement (doi:10.3390/biology11081199), 2022-08-10

### Sample 1.1

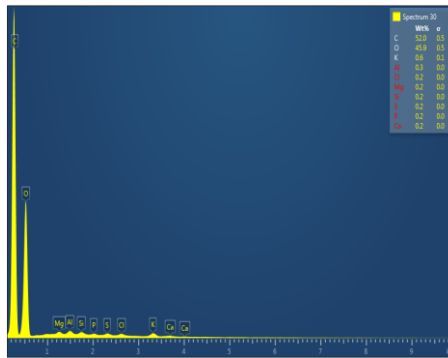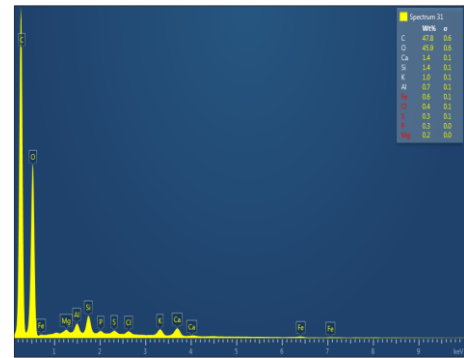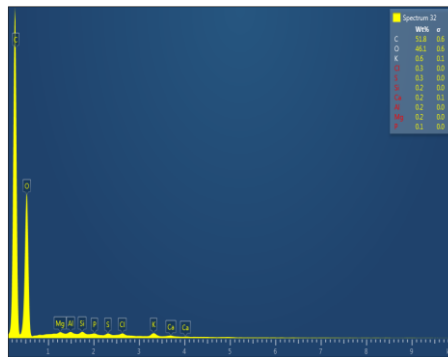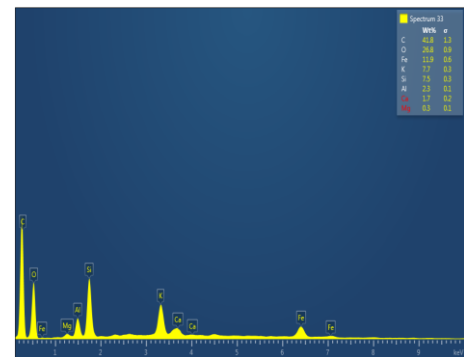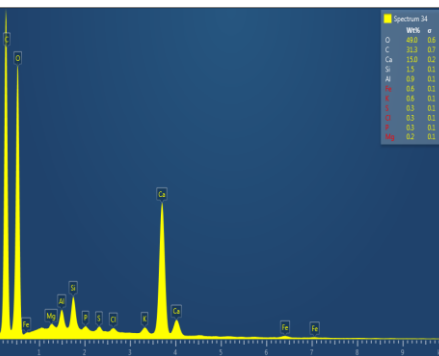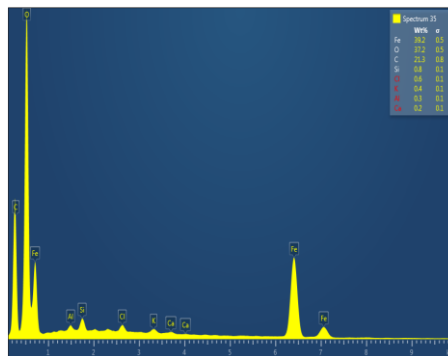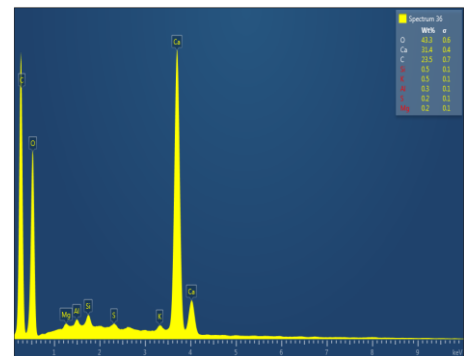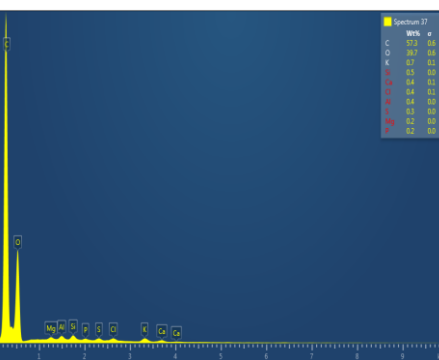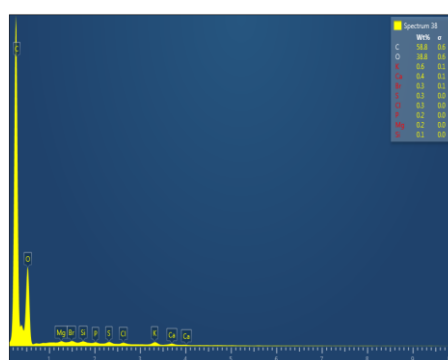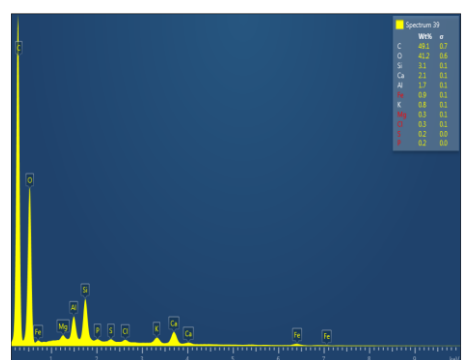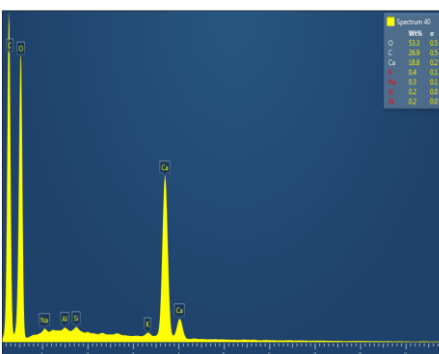

Site 4

Sample 4.1

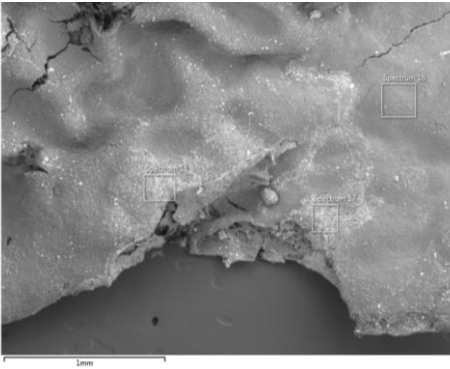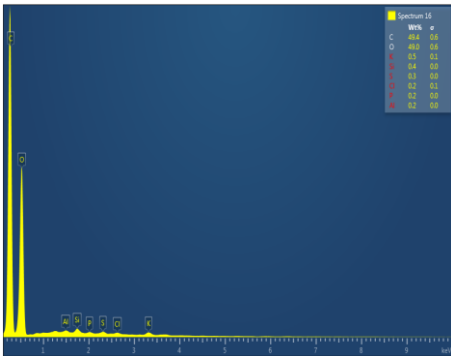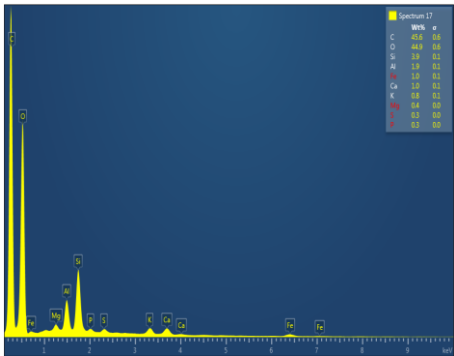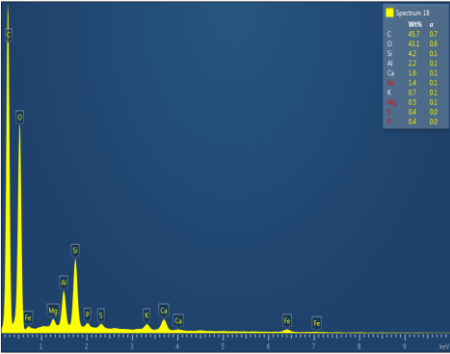

Sample 4.2

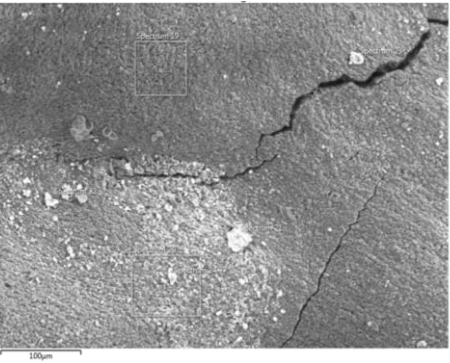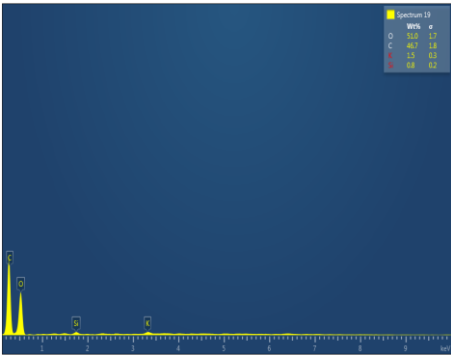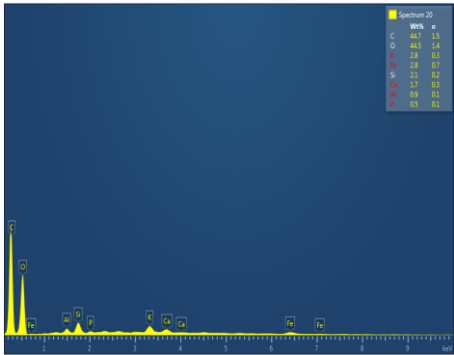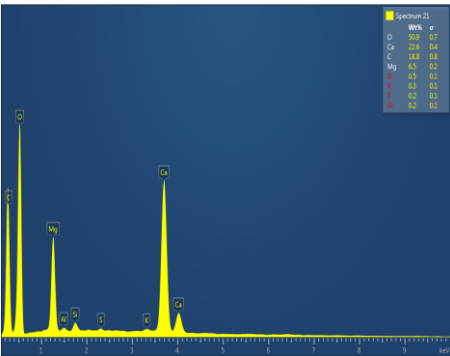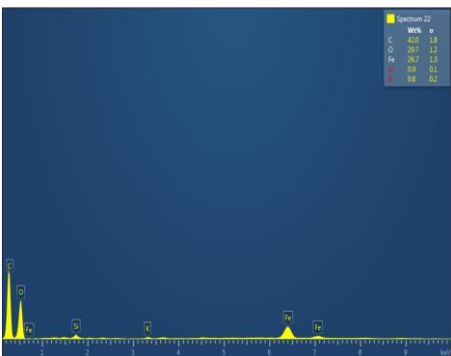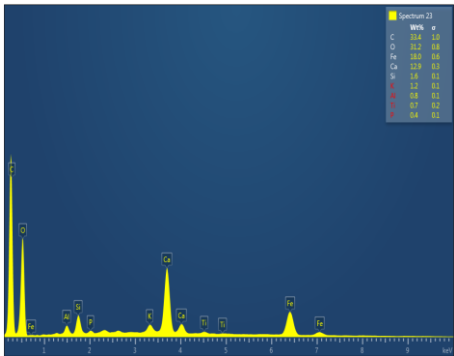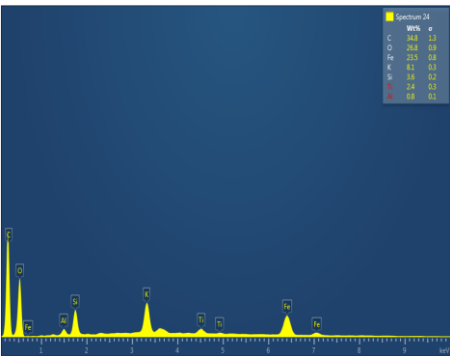

Site 6

Sample 6.1

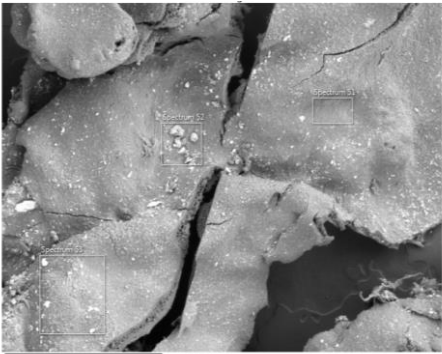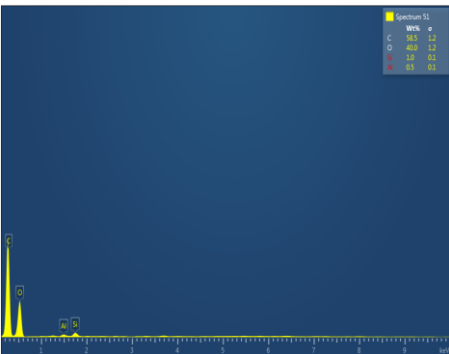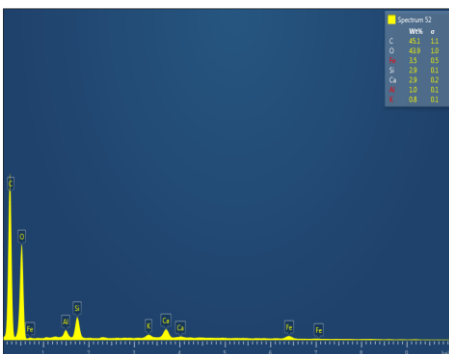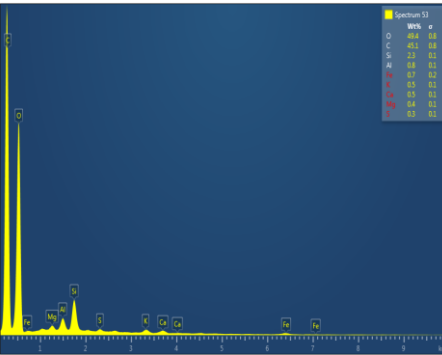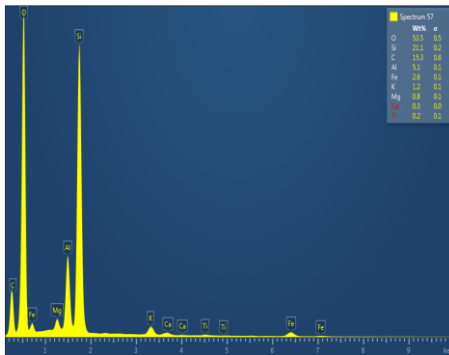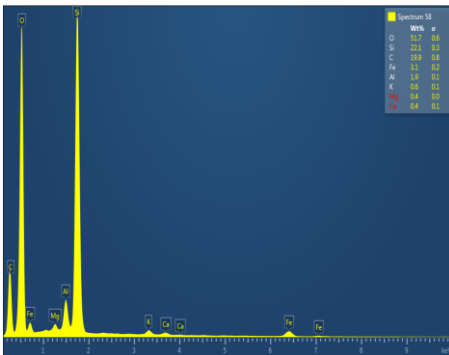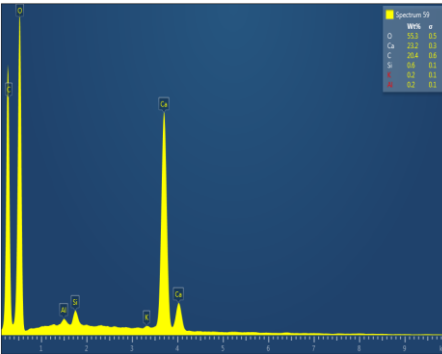

Sample 6.2

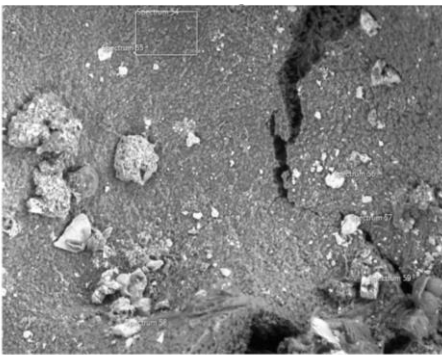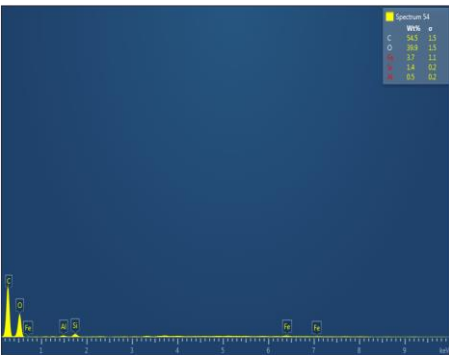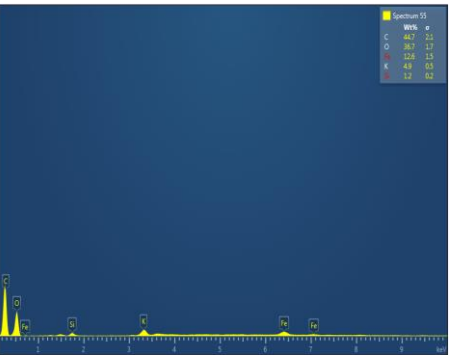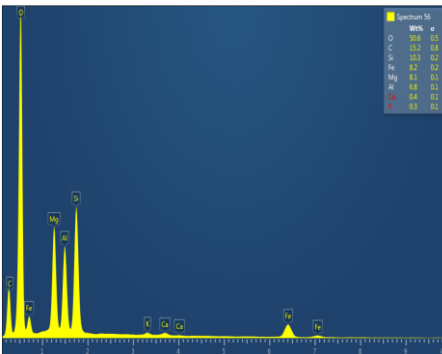

Site 8

Sample 8.1

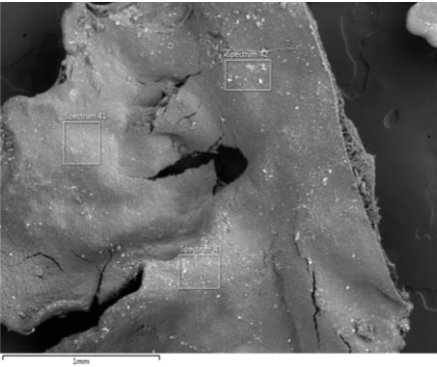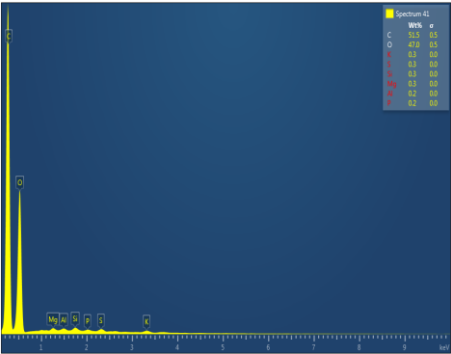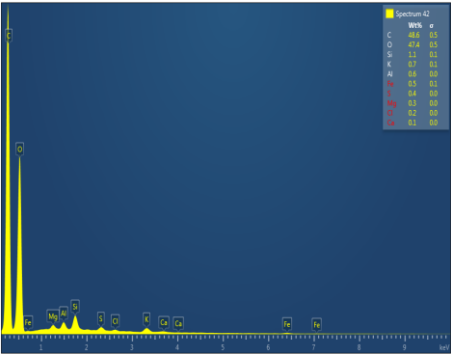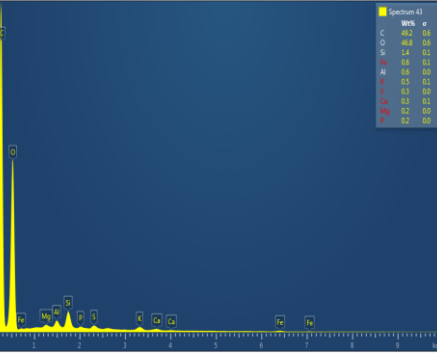

Sample 8.2

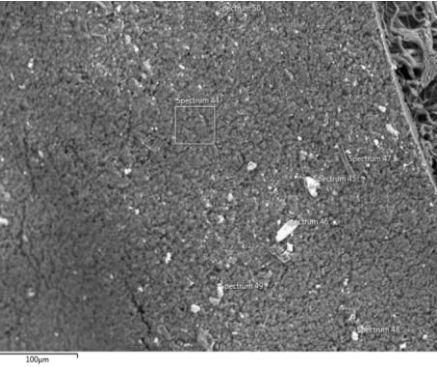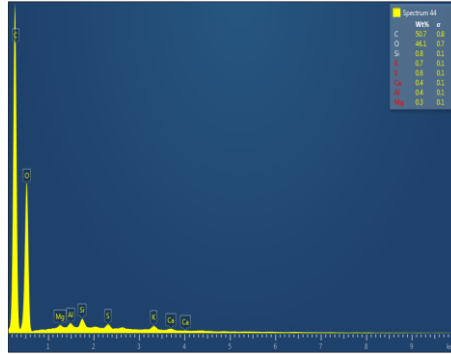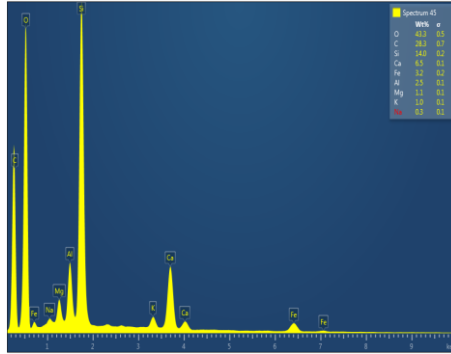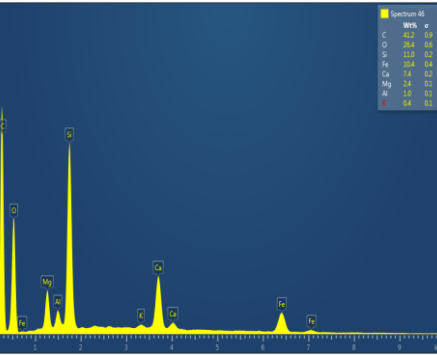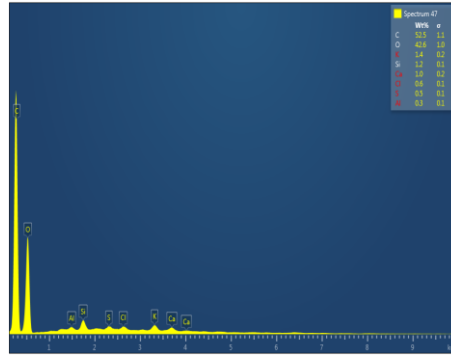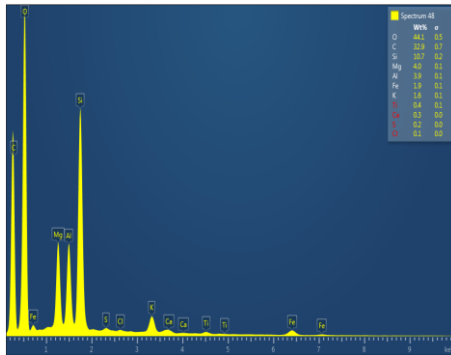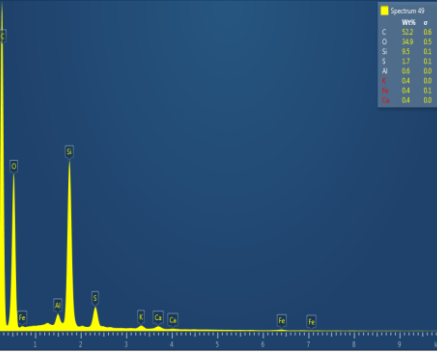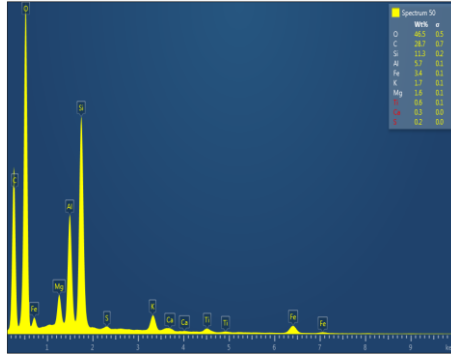

Site 9

Sample 9.1

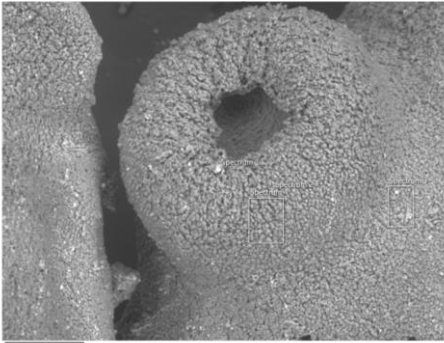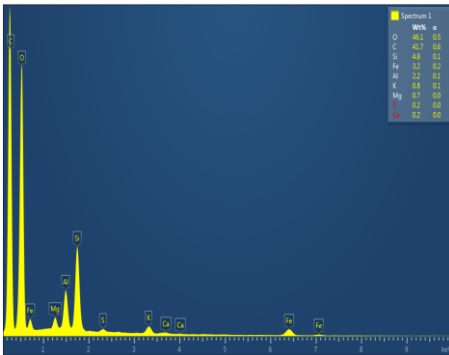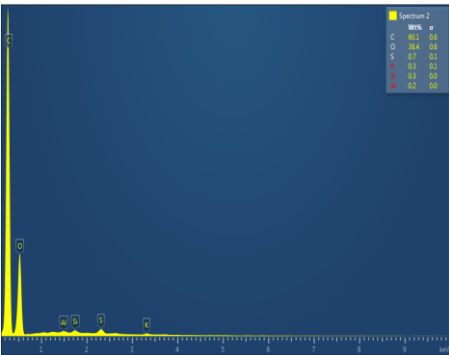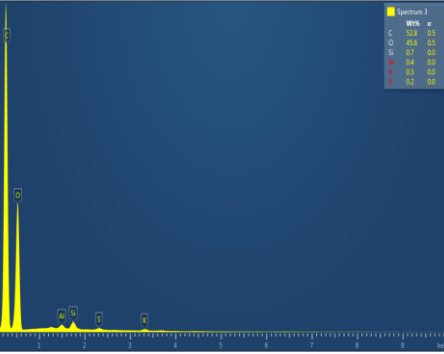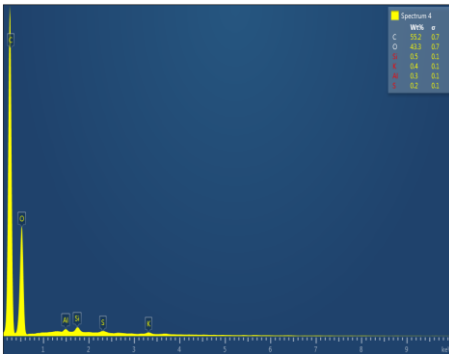

Sample 9.2

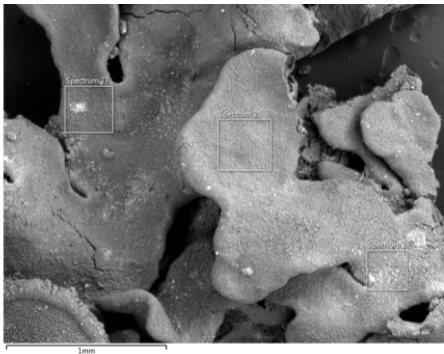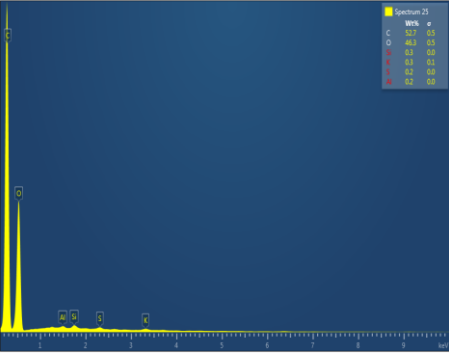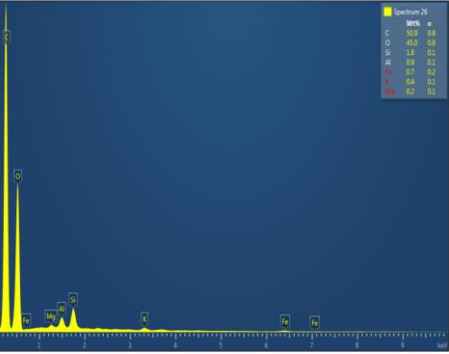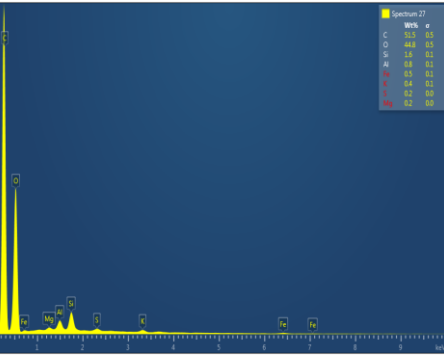

Supplement: s1 [file s1]

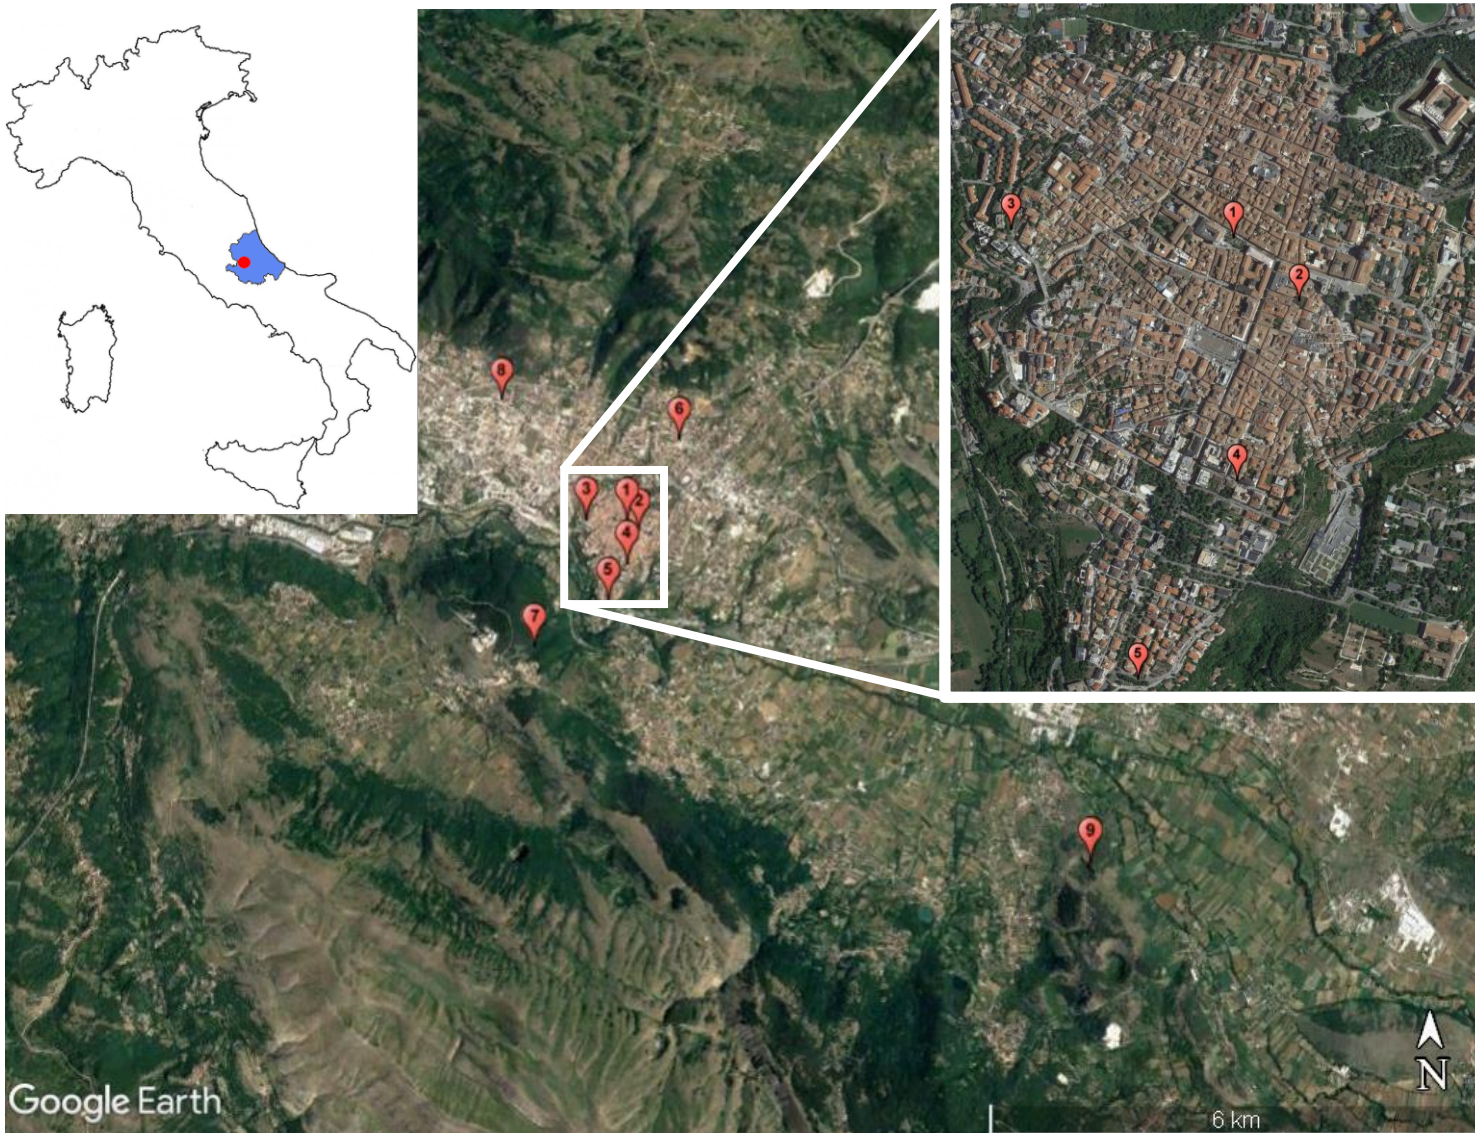

Supplement: s1 [file s1]
